# Supplementary material
Source: publisher figshare collection journal article supplement (https://gsapubs.figshare.com/ndownloader/files/22408515)
Supplement: Supplementary file 3 [file 22408515]

Figure A1. Subregions of the study area in Figure 1 sampled for local determination of seismogenic deformation geometry. Each subregion is depicted by a polygon, and is identified by a four-letter label that is placed as close to the centroid of the polygon as possible to allow for overlapping polygons to be distinguished. Polygons show number and distribution of earthquake focal mechanisms used in individual inversions; inversion results are presented in Table A1. Areas of the map with very small polygons can be enlarged for clarity using the magnification function of Acrobat. Variations in polygon color are for clarity and ease of viewing only.
